# Supplementary material
Source: PubMed Central journal article supplement (PMC2684178)

## Supplemental Figure

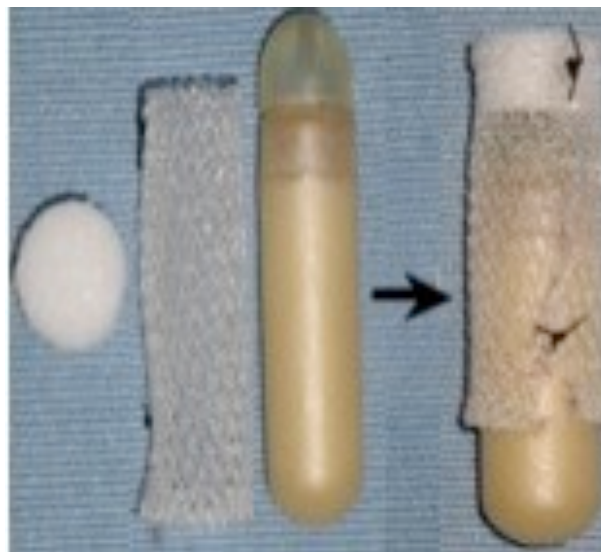

Supplement: ajpath.2009.080765_1.pdf [file ajpath.2009.080765_1.pdf]
